# Supplementary material for: Efficacy and Safety of Acute Phase Intensive Electrical Muscle Stimulation in Frail Older Patients with Acute Heart Failure: Results from the ACTIVE-EMS Trial
Source: MDPI journal article supplement (doi:10.3390/jcdd9040099), 2022-03-27
Supplement: s1 [file s1]

**Table S1.** Inclusion or exclusion criteria.

---

Inclusion criteria

- 1) Patients who were hospitalized for acute exacerbation of heart failure
- 2) Aged 75 years or older
- 3) Frail patients (Short Physical Performance Battery score 4-9)

Exclusion criteria

- 1) B-type natriuretic peptide < 100 pg/ml at admission
  - 2) Cognitive dysfunction
  - 3) Acute coronary syndrome
  - 4) Significant myocardial ischemia during low-intensity exercise
  - 5) Resting heart rate > 120/min
  - 6) Acute infective endocarditis, myocarditis, and pericarditis
  - 7) Presence of a recent hospitalization for heart failure (< 1 month)
  - 8) Severe symptomatic aortic stenosis, mitral stenosis, and hypertrophic obstructive cardiomyopathy
  - 9) Severe pulmonary hypertension
  - 10) Intracardiac thrombus
  - 11) Untreated life-threatening arrhythmia
  - 12) Resting blood pressure > 180 mmHg
  - 13) Ongoing orthopnea
  - 14) Requiring high inotropic support
  - 15) Patients with circulatory assist device
  - 16) Patients with inadequate oxygenation
  - 17) Patients with mechanical ventilation
  - 18) History of aortic dissection, or presence of aortic aneurysm or aortic dissection
  - 19) Patients with uncontrolled diabetes
  - 20) Peripheral arterial disease (Fontain III or IV)
  - 21) Recent embolism
  - 22) Patients undergoing hemodialysis
  - 23) Serum creatinine > 3.0 mg/dl
  - 24) Severe anemia
  - 25) Short life expectancy due to advanced disease other than heart failure
  - 26) Patients who needed assistance for walking a month before hospitalization
  - 27) Pregnant, lactating women, patients may be pregnant
-

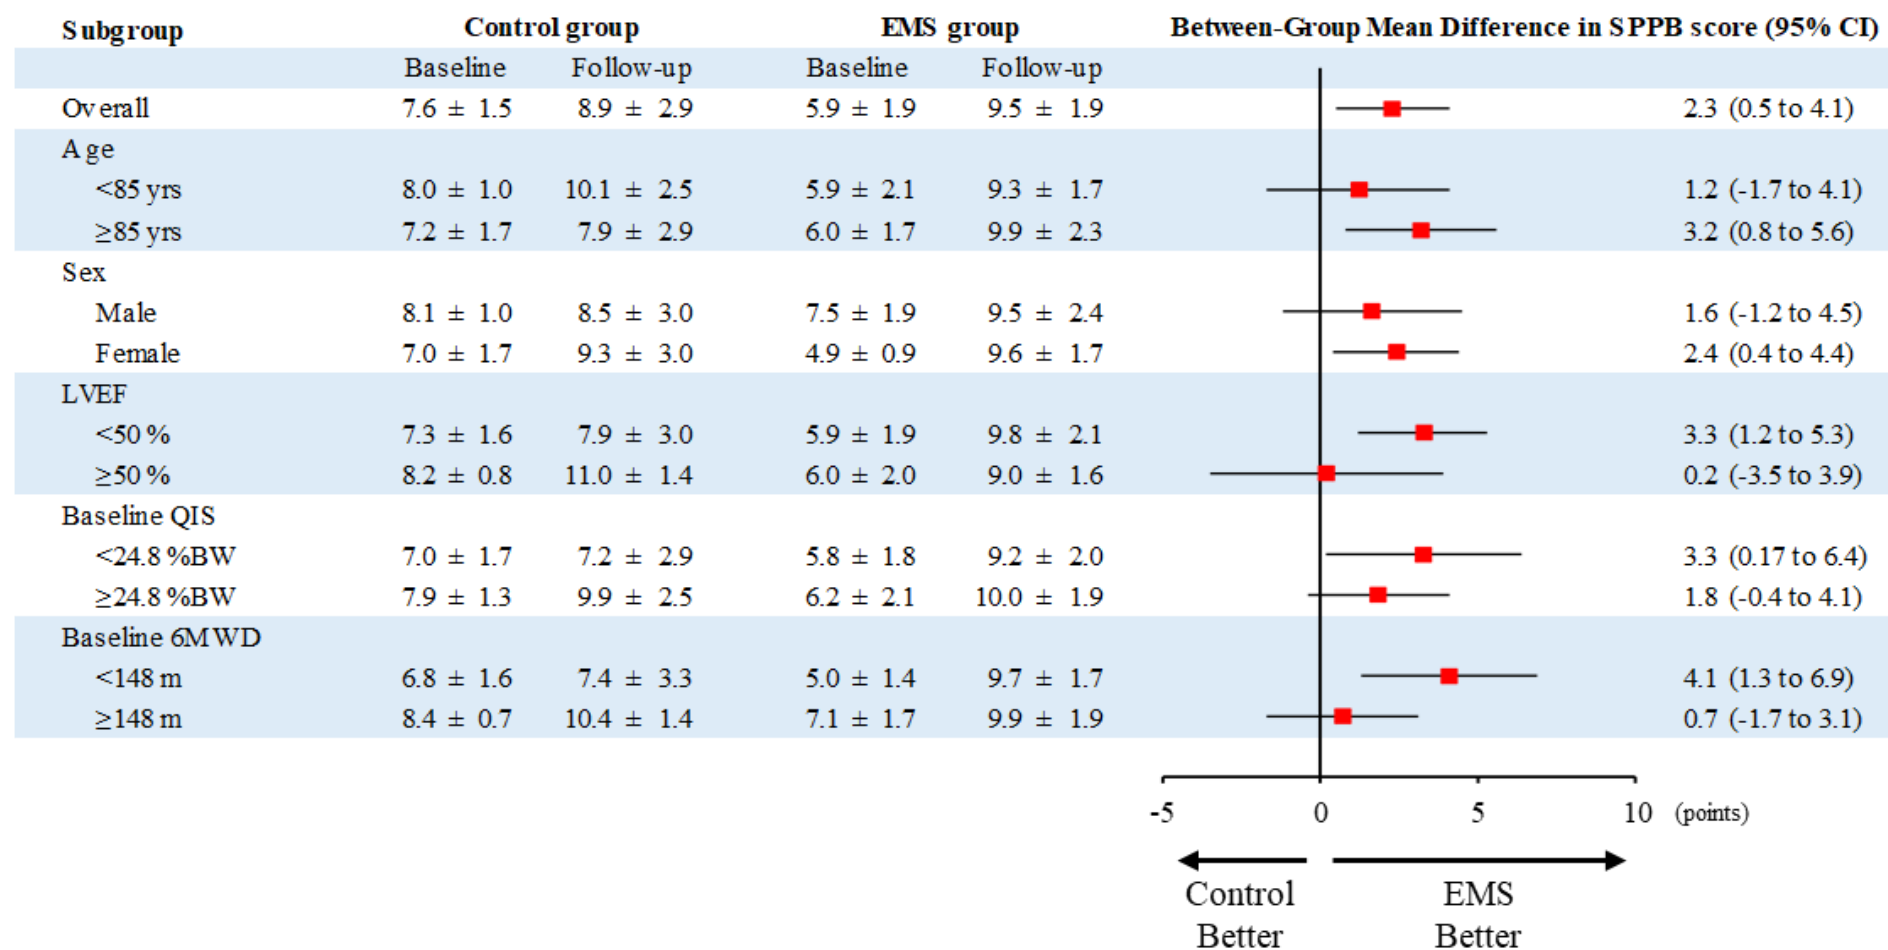

**Figure S1.** Prespecified subgroup analysis of the SPPB.

Values are expressed as means ± SD. BW, body weight; CI, confidence interval; EMS, electrical muscle stimulation; LVEF, left ventricular ejection fraction; QIS, quadriceps isometric strength; SPPB, short physical performance battery; 6MWD, 6-minute walking distance.
